# Supplementary material for: A kinetico-mechanistic study on the C–H bond activation of primary benzylamines; cooperative and solid-state cyclopalladation on dimeric complexes
Source: Royal Society of Chemistry journal article supplement (doi:10.1039/c4dt01463d), 2014-07-01
Supplement: c4dt01463d1.pdf [file c4dt01463d1.pdf]

## **Kinetico-mechanistic study on the C-H bond activation of primary benzylamines; cooperative and solid-state cyclopalladation on dimeric complexes**

*Helena Font,<sup>a</sup> Mercè Font-Bardia,<sup>b,c</sup> Kerman Gómez,<sup>d</sup> Gabriel González,<sup>d</sup> Jaume Granell,<sup>a</sup> Israel Macho<sup>d</sup> and Manuel Martínez.<sup>a</sup>*

<sup>a</sup> Departament de Química Inorgànica, Facultat de Química, Universitat de Barcelona, Martí i Franquès 1-11, E-08028 Barcelona, SPAIN

<sup>b</sup> Unitat de Difracció de RX, Centres Científics i Tecnològics de la Universitat de Barcelona (CCiTUB). Universitat de Barcelona, Solé i Sabarís 1-3, E-08028-Barcelona, SPAIN

<sup>c</sup> Departament de Cristal·lografia, Mineralogia i Dipòsits Minerals. Facultat de Geologia, Martí i Franquès s/n, E-08028-Barcelona, SPAIN

<sup>d</sup> Unitat de Ressonància Magnètica Nuclear, ICIQ - Institut Català d'Investigació Química, Avinguda Països Catalans 16, E-43007 Tarragona, SPAIN

Supporting information**Table S1.-** Rate constant data for the monitored cyclometallation processes indicated.

| Reaction                      | Solvent | [Pd] /M            | T/°C        | P /bar             | $k_{fast} /s^{-1}$    | $k_{slow} /s^{-1}$    |                      |                      |
|-------------------------------|---------|--------------------|-------------|--------------------|-----------------------|-----------------------|----------------------|----------------------|
| $(1H)_2 \rightarrow (2H)_2$   | Toluene | $5 \times 10^{-4}$ | 21          | 1                  | $0.41 \times 10^{-4}$ |                       |                      |                      |
|                               |         | $5 \times 10^{-4}$ | 31          | 1                  | $1.5 \times 10^{-4}$  |                       |                      |                      |
|                               |         | $5 \times 10^{-4}$ | 43          | 1                  | $6.6 \times 10^{-4}$  | $0.45 \times 10^{-4}$ |                      |                      |
|                               |         | $1 \times 10^{-4}$ | 45          | 1                  | $8.0 \times 10^{-4}$  |                       |                      |                      |
|                               |         | $1 \times 10^{-4}$ | 45          | 600                | $1.3 \times 10^{-3}$  |                       |                      |                      |
|                               |         | $1 \times 10^{-4}$ | 45          | 1200               | $2.3 \times 10^{-3}$  |                       |                      |                      |
|                               |         | $1 \times 10^{-4}$ | 45          | 1500               | $3.7 \times 10^{-3}$  |                       |                      |                      |
|                               |         | $5 \times 10^{-4}$ | 48          | 1                  | $8.1 \times 10^{-4}$  | $0.90 \times 10^{-4}$ |                      |                      |
|                               |         | $5 \times 10^{-4}$ | 50          | 1                  | $12 \times 10^{-4}$   | $1.0 \times 10^{-4}$  |                      |                      |
|                               |         | $5 \times 10^{-4}$ | 60          | 1                  | $28 \times 10^{-4}$   | $1.8 \times 10^{-4}$  |                      |                      |
|                               |         | $5 \times 10^{-4}$ | 70          | 1                  |                       | $4.0 \times 10^{-4}$  |                      |                      |
|                               |         | $1 \times 10^{-4}$ | 70          | 400                |                       | $2.8 \times 10^{-4}$  |                      |                      |
|                               |         | $1 \times 10^{-4}$ | 70          | 600                |                       | $2.7 \times 10^{-4}$  |                      |                      |
|                               |         | $1 \times 10^{-4}$ | 70          | 900                |                       | $3.7 \times 10^{-4}$  |                      |                      |
|                               |         | $1 \times 10^{-4}$ | 70          | 1200               |                       | $4.2 \times 10^{-4}$  |                      |                      |
|                               |         | $1 \times 10^{-4}$ | 70          | 1500               |                       | $4.8 \times 10^{-4}$  |                      |                      |
|                               |         | $5 \times 10^{-4}$ | 78          | 1                  |                       | $6.7 \times 10^{-4}$  |                      |                      |
|                               |         | $5 \times 10^{-4}$ | 88          | 1                  |                       | $15 \times 10^{-4}$   |                      |                      |
|                               |         |                    | Acetic acid | $5 \times 10^{-4}$ | 20                    | 1                     | $3.5 \times 10^{-4}$ |                      |
|                               |         |                    |             | $5 \times 10^{-4}$ | 25                    | 1                     | $7.7 \times 10^{-4}$ |                      |
|                               |         |                    |             | $5 \times 10^{-4}$ | 25                    | 400                   | $7.2 \times 10^{-4}$ |                      |
|                               |         |                    |             | $5 \times 10^{-4}$ | 25                    | 600                   | $8 \times 10^{-4}$   |                      |
|                               |         |                    |             | $5 \times 10^{-4}$ | 25                    | 900                   | $8.7 \times 10^{-4}$ |                      |
|                               |         |                    |             | $5 \times 10^{-4}$ | 30                    | 1                     | $1.1 \times 10^{-3}$ |                      |
|                               |         |                    |             | $5 \times 10^{-4}$ | 40                    | 1                     | $6.6 \times 10^{-3}$ | $0.4 \times 10^{-4}$ |
|                               |         |                    |             | $5 \times 10^{-4}$ | 50                    | 1                     | $7.8 \times 10^{-3}$ | $1.1 \times 10^{-4}$ |
|                               |         |                    |             | $5 \times 10^{-4}$ | 55                    | 1                     |                      | $2.8 \times 10^{-4}$ |
|                               |         | $5 \times 10^{-4}$ | 55          | 400                |                       | $2.4 \times 10^{-4}$  |                      |                      |
|                               |         | $5 \times 10^{-4}$ | 55          | 600                |                       | $1.5 \times 10^{-4}$  |                      |                      |
|                               |         | $5 \times 10^{-4}$ | 55          | 900                |                       | $2.0 \times 10^{-4}$  |                      |                      |
|                               |         | $5 \times 10^{-4}$ | 55          | 1200               |                       | $1.0 \times 10^{-4}$  |                      |                      |
|                               |         | $5 \times 10^{-4}$ | 55          | 1500               |                       | $1.3 \times 10^{-4}$  |                      |                      |
|                               |         | $5 \times 10^{-4}$ | 60          | 1                  |                       | $4.4 \times 10^{-4}$  |                      |                      |
|                               |         | $5 \times 10^{-4}$ | 70          | 1                  |                       | $16 \times 10^{-4}$   |                      |                      |
| $(1Cl)_2 \rightarrow (2Cl)_2$ | Toluene | $5 \times 10^{-4}$ | 35          | 1                  | $3.8 \times 10^{-4}$  |                       |                      |                      |
|                               |         | $5 \times 10^{-4}$ | 40          | 1                  | $6.8 \times 10^{-4}$  | $0.16 \times 10^{-4}$ |                      |                      |
|                               |         | $5 \times 10^{-4}$ | 50          | 1                  | $14 \times 10^{-4}$   | $0.65 \times 10^{-4}$ |                      |                      |
|                               |         | $5 \times 10^{-4}$ | 60          | 1                  | $30 \times 10^{-4}$   | $1.4 \times 10^{-4}$  |                      |                      |
|                               |         | $5 \times 10^{-4}$ | 63          | 1                  | $38 \times 10^{-4}$   | $2.4 \times 10^{-4}$  |                      |                      |
|                               |         | $1 \times 10^{-4}$ | 65          | 1                  |                       | $2.8 \times 10^{-4}$  |                      |                      |
|                               |         | $1 \times 10^{-4}$ | 65          | 300                |                       | $1.10 \times 10^{-4}$ |                      |                      |
|                               |         | $1 \times 10^{-4}$ | 65          | 600                |                       | $1.23 \times 10^{-4}$ |                      |                      |
|                               |         | $1 \times 10^{-4}$ | 65          | 900                |                       | $1.79 \times 10^{-4}$ |                      |                      |
|                               |         | $1 \times 10^{-4}$ | 65          | 1200               |                       | $1.85 \times 10^{-4}$ |                      |                      |
|                               |         |                    | Acetic acid | $1 \times 10^{-4}$ | 30                    | 1                     | $2.0 \times 10^{-4}$ |                      |

|                                                                                 |             |                    |    |      |                      |                       |
|---------------------------------------------------------------------------------|-------------|--------------------|----|------|----------------------|-----------------------|
|                                                                                 |             | $1 \times 10^{-4}$ | 30 | 300  | $1.4 \times 10^{-4}$ |                       |
|                                                                                 |             | $1 \times 10^{-4}$ | 30 | 600  | $1.7 \times 10^{-4}$ |                       |
|                                                                                 |             | $1 \times 10^{-4}$ | 30 | 900  | $1.6 \times 10^{-4}$ |                       |
|                                                                                 |             | $1 \times 10^{-4}$ | 30 | 1200 | $1.8 \times 10^{-4}$ |                       |
|                                                                                 |             | $4 \times 10^{-4}$ | 35 | 1    | $0.3 \times 10^{-3}$ |                       |
|                                                                                 |             | $4 \times 10^{-4}$ | 47 | 1    | $1.5 \times 10^{-3}$ |                       |
|                                                                                 |             | $4 \times 10^{-4}$ | 56 | 1    | $3.6 \times 10^{-3}$ | $0.3 \times 10^{-3}$  |
|                                                                                 |             | $4 \times 10^{-4}$ | 65 | 1    | $6.0 \times 10^{-3}$ | $0.9 \times 10^{-3}$  |
|                                                                                 |             | $4 \times 10^{-4}$ | 75 | 1    |                      | $3.0 \times 10^{-3}$  |
| <b>(1F)<sub>2</sub> → (2F)<sub>2</sub></b>                                      | Toluene     | $4 \times 10^{-4}$ | 53 | 1    |                      | $22.5 \times 10^{-5}$ |
|                                                                                 |             | $4 \times 10^{-4}$ | 52 | 1    |                      | $6.7 \times 10^{-5}$  |
|                                                                                 |             | $4 \times 10^{-4}$ | 70 | 1    |                      | $1.4 \times 10^{-4}$  |
|                                                                                 |             | $4 \times 10^{-4}$ | 80 | 1    |                      | $3.3 \times 10^{-4}$  |
|                                                                                 | Acetic acid | $4 \times 10^{-4}$ | 25 | 1    |                      | $2.5 \times 10^{-4}$  |
|                                                                                 |             | $4 \times 10^{-4}$ | 34 | 400  |                      | $5.2 \times 10^{-4}$  |
|                                                                                 |             | $4 \times 10^{-4}$ |    | 600  |                      | $5.0 \times 10^{-4}$  |
|                                                                                 |             | $4 \times 10^{-4}$ |    | 900  |                      | $5.2 \times 10^{-4}$  |
|                                                                                 |             | $4 \times 10^{-4}$ |    | 1000 |                      | $5.8 \times 10^{-4}$  |
|                                                                                 |             | $4 \times 10^{-4}$ |    | 1200 |                      | $5.8 \times 10^{-4}$  |
|                                                                                 |             | $4 \times 10^{-4}$ |    | 1600 |                      | $6.3 \times 10^{-4}$  |
|                                                                                 |             | $4 \times 10^{-4}$ | 37 | 1    |                      | $5.6 \times 10^{-4}$  |
|                                                                                 |             | $4 \times 10^{-4}$ | 50 | 1    |                      | $15 \times 10^{-4}$   |
| <b>(1CF<sub>3</sub>)<sub>2</sub> → (2CF<sub>3</sub>)<sub>2</sub></b>            | Toluene     | $4 \times 10^{-4}$ | 52 | 1    |                      | $2.5 \times 10^{-5}$  |
|                                                                                 |             | $4 \times 10^{-4}$ | 60 | 1    |                      | $3.5 \times 10^{-5}$  |
|                                                                                 |             | $4 \times 10^{-4}$ | 70 | 1    |                      | $1.6 \times 10^{-4}$  |
|                                                                                 |             | $4 \times 10^{-4}$ | 80 | 1    |                      | $2.7 \times 10^{-4}$  |
|                                                                                 | Acetic acid | $4 \times 10^{-4}$ | 25 | 1    |                      | $6.8 \times 10^{-5}$  |
|                                                                                 |             | $4 \times 10^{-4}$ | 34 | 400  |                      | $1.7 \times 10^{-4}$  |
|                                                                                 |             | $4 \times 10^{-4}$ | 34 | 700  |                      | $1.6 \times 10^{-4}$  |
|                                                                                 |             | $4 \times 10^{-4}$ | 34 | 1000 |                      | $1.5 \times 10^{-4}$  |
|                                                                                 |             | $4 \times 10^{-4}$ | 34 | 1300 |                      | $2.0 \times 10^{-4}$  |
|                                                                                 |             | $4 \times 10^{-4}$ | 34 | 1600 |                      | $1.7 \times 10^{-4}$  |
|                                                                                 |             | $4 \times 10^{-4}$ | 50 | 1    |                      | $10 \times 10^{-4}$   |
|                                                                                 |             | $4 \times 10^{-4}$ | 60 | 1    |                      | $37 \times 10^{-4}$   |
| <b>Pd(AcO)<sub>2</sub> + ClBzNH<sub>2</sub> → (2Cl)<sub>2</sub><sup>a</sup></b> | Toluene     | $1 \times 10^{-4}$ | 42 | 1    |                      | $0.1 \times 10^{-4}$  |
|                                                                                 |             | $1 \times 10^{-4}$ | 52 | 1    |                      | $0.4 \times 10^{-4}$  |
|                                                                                 |             | $1 \times 10^{-4}$ | 63 | 1    |                      | $1.3 \times 10^{-4}$  |
|                                                                                 |             | $1 \times 10^{-4}$ | 65 | 1    |                      | $1.3 \times 10^{-4}$  |
|                                                                                 |             | $1 \times 10^{-4}$ | 65 | 300  |                      | $1.3 \times 10^{-4}$  |
|                                                                                 |             | $1 \times 10^{-4}$ | 65 | 600  |                      | $1.5 \times 10^{-4}$  |
|                                                                                 |             | $1 \times 10^{-4}$ | 65 | 900  |                      | $1.6 \times 10^{-4}$  |
|                                                                                 |             | $1 \times 10^{-4}$ | 65 | 1200 |                      | $1.8 \times 10^{-4}$  |
|                                                                                 |             | $1 \times 10^{-4}$ | 68 | 1    |                      | $2.1 \times 10^{-4}$  |
|                                                                                 | Acetic acid | $1 \times 10^{-4}$ | 56 | 1    |                      | $0.90 \times 10^{-4}$ |
|                                                                                 |             | $1 \times 10^{-4}$ | 60 | 1    |                      | $1.4 \times 10^{-4}$  |
|                                                                                 |             | $1 \times 10^{-4}$ | 65 | 1    |                      | $2.2 \times 10^{-4}$  |
|                                                                                 |             | $1 \times 10^{-4}$ | 65 | 300  |                      | $1.5 \times 10^{-4}$  |
|                                                                                 |             | $1 \times 10^{-4}$ | 65 | 600  |                      | $1.7 \times 10^{-4}$  |
|                                                                                 |             | $1 \times 10^{-4}$ | 65 | 900  |                      | $1.4 \times 10^{-4}$  |
|                                                                                 |             | $1 \times 10^{-4}$ | 65 | 1200 |                      | $2.4 \times 10^{-4}$  |
|                                                                                 |             | $1 \times 10^{-4}$ | 65 | 1500 |                      | $2.8 \times 10^{-4}$  |
|                                                                                 |             | $1 \times 10^{-4}$ | 72 | 1    |                      | $4.0 \times 10^{-4}$  |
|                                                                                 |             | $1 \times 10^{-4}$ | 80 | 1    |                      | $12 \times 10^{-4}$   |

|                                                                                                  |         |                    |    |      |                      |
|--------------------------------------------------------------------------------------------------|---------|--------------------|----|------|----------------------|
| $\text{Pd}(\text{AcO})_2 + \text{FBzNH}_2 \rightarrow (\mathbf{2CF})_2$ <sup>a</sup>             | Toluene | $3 \times 10^{-4}$ | 59 | 1    | $3.0 \times 10^{-5}$ |
|                                                                                                  |         | $3 \times 10^{-4}$ | 73 | 1    | $1.6 \times 10^{-4}$ |
|                                                                                                  |         | $3 \times 10^{-4}$ | 75 | 400  | $2.5 \times 10^{-4}$ |
|                                                                                                  |         | $3 \times 10^{-4}$ | 75 | 700  | $2.7 \times 10^{-4}$ |
|                                                                                                  |         | $3 \times 10^{-4}$ | 75 | 1000 | $3.0 \times 10^{-4}$ |
|                                                                                                  |         | $3 \times 10^{-4}$ | 75 | 1300 | $3.2 \times 10^{-4}$ |
|                                                                                                  |         | $3 \times 10^{-4}$ | 75 | 1600 | $3.7 \times 10^{-4}$ |
|                                                                                                  |         | $3 \times 10^{-4}$ | 88 | 1    | $4.5 \times 10^{-4}$ |
| $\text{Pd}(\text{AcO})_2 + \text{CF}_3\text{BzNH}_2 \rightarrow (\mathbf{2CF}_3)_2$ <sup>a</sup> | Toluene | $3 \times 10^{-4}$ | 49 | 1    | $1.1 \times 10^{-5}$ |
|                                                                                                  |         | $3 \times 10^{-4}$ | 73 | 1    | $2.8 \times 10^{-4}$ |
|                                                                                                  |         | $3 \times 10^{-4}$ | 75 | 400  | $3.7 \times 10^{-4}$ |
|                                                                                                  |         | $3 \times 10^{-4}$ | 75 | 700  | $4.6 \times 10^{-4}$ |
|                                                                                                  |         | $3 \times 10^{-4}$ | 75 | 1000 | $5.6 \times 10^{-4}$ |
|                                                                                                  |         | $3 \times 10^{-4}$ | 75 | 1300 | $6.5 \times 10^{-4}$ |
|                                                                                                  |         | $3 \times 10^{-4}$ | 75 | 1600 | $7.8 \times 10^{-4}$ |
|                                                                                                  |         | $3 \times 10^{-4}$ | 83 | 1    | $5.6 \times 10^{-4}$ |

<sup>a</sup> One-pot process, [Pd]:[amine] in the 0.8-1.2 range, a single step is observed.

**Table S2.-** Rate constant data for the monitored one-pot cyclometallation of the secondary (BzNMeH) and tertiary (BzNMe<sub>2</sub>) amines indicated, [Pd]:[amine] in the 0.8-1.2 range, a single step is observed.

| Reaction                                    | Solvent | [Pd] /M            | T /°C       | P /bar | k /s <sup>-1</sup>    |                       |
|---------------------------------------------|---------|--------------------|-------------|--------|-----------------------|-----------------------|
| Pd(AcO) <sub>2</sub> + BzNMeH →             | Toluene | 1×10 <sup>-4</sup> | 36          | 1      | 0.40×10 <sup>-4</sup> |                       |
|                                             |         | 1×10 <sup>-4</sup> | 42          | 1      | 0.80×10 <sup>-4</sup> |                       |
|                                             |         | 1×10 <sup>-4</sup> | 50          | 1      | 2.0×10 <sup>-4</sup>  |                       |
|                                             |         | 1×10 <sup>-4</sup> | 50          | 300    | 1.4×10 <sup>-4</sup>  |                       |
|                                             |         | 1×10 <sup>-4</sup> | 50          | 600    | 1.6×10 <sup>-4</sup>  |                       |
|                                             |         | 1×10 <sup>-4</sup> | 50          | 900    | 1.8×10 <sup>-4</sup>  |                       |
|                                             |         | 1×10 <sup>-4</sup> | 50          | 1200   | 2.0×10 <sup>-4</sup>  |                       |
|                                             |         | 1×10 <sup>-4</sup> | 50          | 1500   | 2.1×10 <sup>-4</sup>  |                       |
|                                             |         | 1×10 <sup>-4</sup> | 62          | 1      | 6.5×10 <sup>-4</sup>  |                       |
|                                             |         | 1×10 <sup>-4</sup> | 68          | 1      | 12×10 <sup>-4</sup>   |                       |
|                                             |         | 1×10 <sup>-4</sup> | Acetic acid | 51     | 1                     | 0.60×10 <sup>-3</sup> |
|                                             |         | 1×10 <sup>-4</sup> |             | 56     | 1                     | 1.1×10 <sup>-3</sup>  |
|                                             |         | 1×10 <sup>-4</sup> |             | 61     | 1                     | 1.7×10 <sup>-3</sup>  |
|                                             |         | 1×10 <sup>-4</sup> |             | 65     | 1                     | 2.8×10 <sup>-3</sup>  |
| Pd(AcO) <sub>2</sub> + BzNMe <sub>2</sub> → | Toluene | 1×10 <sup>-4</sup> | 29          | 1      | 1.8×10 <sup>-3</sup>  |                       |
|                                             |         | 1×10 <sup>-4</sup> | 36          | 1      | 3.0×10 <sup>-3</sup>  |                       |
|                                             |         | 1×10 <sup>-4</sup> | 42          | 1      | 4.4×10 <sup>-3</sup>  |                       |
|                                             |         | 1×10 <sup>-4</sup> | 50          | 1      | 6.6×10 <sup>-3</sup>  |                       |
|                                             |         | 1×10 <sup>-4</sup> | 62          | 1      | 10×10 <sup>-3</sup>   |                       |
|                                             |         | 1×10 <sup>-4</sup> | 69          | 1      | 17×10 <sup>-3</sup>   |                       |

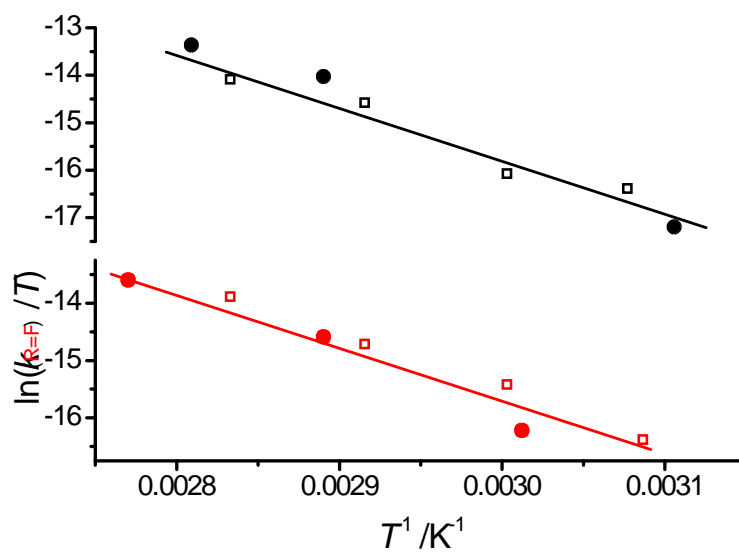

**Figure S1.** Eyring plots for the metallation reaction of some of the compounds studied in toluene solution starting both from compounds  $(\mathbf{1F})_2$  and  $(\mathbf{1CF}_3)_2$  (empty points) and palladium acetate plus amine (full points).+
